# Supplementary material
Source: HighWire-hosted journal article supplement (https://www.canjsurg.ca/highwire/filestream/97056/field_highwire_adjunct_files/0/004619-at-1.pdf)
Supplement: 004619-at-1.pdf [file 004619-at-1.pdf]

DOI: 10.1503/cjs.004619

*Online appendices are unedited and posted as supplied by the authors.*

## **Appendix 1. Literature search strategy**

### **Systematic Review: Outcomes of Diabetic Foot Ulceration in the First Nations Population**

Dr. David Pace            [pacedavid@me.com](mailto:pacedavid@me.com)

Dr. David Isa            [ahaorvi@gmail.com](mailto:ahaorvi@gmail.com)

In patients with diabetic foot ulcers, do patients of Indigenous (First Nations/Aboriginal) ethnicity have worse outcomes compared to Non-Indigenous patients? (Focus is Canada/U.S./Australia/New Zealand.)

<http://www.refworks.com/refshare2?site=033791146456000000/116501409920402025/isa-pace-dfu>

*Searches run by Kristen Romme on October 12, 2018*

|                                |     |
|--------------------------------|-----|
| PubMed                         | 77  |
| Embase                         | 85  |
| CINAHL Plus with Full Text     | 38  |
| Cochrane Library               | 5   |
| Total                          | 205 |
| Duplicates Removed             | 88  |
| Total after Duplicates Removed | 117 |

|    | <b>PubMed Query 2018-10-12</b>                                                                                                                                                                                                                                                                                                                                                                                                 | <b>Results</b> |
|----|--------------------------------------------------------------------------------------------------------------------------------------------------------------------------------------------------------------------------------------------------------------------------------------------------------------------------------------------------------------------------------------------------------------------------------|----------------|
| #1 | "Diabetic Foot"[Mesh] OR ("Diabetes Mellitus"[Mesh] AND "Foot Ulcer"[Mesh])                                                                                                                                                                                                                                                                                                                                                    | 8044           |
| #2 | "diabetic foot"[tw] OR "diabetic feet"[tw] OR diabetic ulcer*[tw] OR (diabet*[tw] AND ulcer*[tw] AND (foot[tw] OR feet[tw]))                                                                                                                                                                                                                                                                                                   | 11990          |
| #3 | #1 OR #2                                                                                                                                                                                                                                                                                                                                                                                                                       | 11990          |
| #4 | "Health Services, Indigenous"[Mesh] OR "American Native Continental Ancestry Group"[Mesh] OR "Oceanic Ancestry Group"[Mesh]                                                                                                                                                                                                                                                                                                    | 30374          |
| #5 | aborigin*[tw] OR alaska native*[tw] OR alaskan native*[tw] OR aleut*[tw] OR american indian*[tw] OR amerind*[tw] OR bushmen[tw] OR eskimo*[tw] OR "first nation"[tw] OR "first nations"[tw] OR hawaiian native*[tw] OR indigen*[tw] OR innu*[tw] OR inuit*[tw] OR inupiat*[tw] OR kalaallit*[tw] OR maori*[tw] OR metis[tw] OR native american*[tw] OR native hawaiian*[tw] OR native people*[tw] OR native population*[tw] OR | 76030          |

**Appendix 1** to Isa S, Pace D. Is ethnicity an appropriate measure of health care marginalization? A systematic review and meta-analysis of the outcomes of diabetic foot ulceration in Aboriginal populations. *Can J Surg* 2021. Copyright © 2021 The Author(s) or their employer(s). To receive this resource in an accessible format, please contact us at [cmajgroup.cmajca](mailto:cmajgroup.cmajca).

DOI: 10.1503/cjs.004619

Online appendices are unedited and posted as supplied by the authors.

|    |                                                                                                                                             |        |
|----|---------------------------------------------------------------------------------------------------------------------------------------------|--------|
|    | navaho*[tw] OR navajo*[tw] OR pacific islander*[tw] OR pasifika*[tw] OR torres strait islander*[tw] OR tribal[tw] OR tribe*[tw] OR zuni[tw] |        |
| #6 | #4 OR #5                                                                                                                                    | 84,573 |
| #7 | #3 AND #6                                                                                                                                   | 78     |
| #8 | #7 AND "English"[la]                                                                                                                        | 77     |

|    | <b>Embase Query 2018-10-12</b>                                                                                                                                                                                                                                                                                                                                                                                                                                                                                                                                                                                                            | <b>Results</b> |
|----|-------------------------------------------------------------------------------------------------------------------------------------------------------------------------------------------------------------------------------------------------------------------------------------------------------------------------------------------------------------------------------------------------------------------------------------------------------------------------------------------------------------------------------------------------------------------------------------------------------------------------------------------|----------------|
| #1 | 'diabetic foot'/exp OR 'diabetic foot infection'/exp OR 'diabetic foot osteomyelitis'/exp OR ('diabetes mellitus'/exp AND 'foot ulcer'/exp)                                                                                                                                                                                                                                                                                                                                                                                                                                                                                               | 14,562         |
| #2 | "diabetic foot":ab,ti OR "diabetic feet":ab,ti OR "diabetic ulcer*":ab,ti OR (diabet*ab,ti AND ulcer*ab,ti AND (foot:ab,ti OR feet:ab,ti))                                                                                                                                                                                                                                                                                                                                                                                                                                                                                                | 13,082         |
| #3 | #1 OR #2                                                                                                                                                                                                                                                                                                                                                                                                                                                                                                                                                                                                                                  | 17,379         |
| #4 | 'Alaska Native'/exp OR 'American Indian'/exp OR 'Australian Aborigine'/exp OR 'Canadian Aboriginal'/exp OR 'First Nation'/exp OR 'Indigenous Australian'/exp OR 'indigenous health care'/exp OR 'indigenous people'/de OR 'Maori (people)'/exp OR 'Native Hawaiian'/exp                                                                                                                                                                                                                                                                                                                                                                   | 32,511         |
| #5 | aborigin*ab,ti OR "alaska native*":ab,ti OR alaskan native*ab,ti OR aleut*ab,ti OR "american indian*":ab,ti OR amerind*ab,ti OR bushmen:ab,ti OR eskimo*ab,ti OR "first nation":ab,ti OR "first nations":ab,ti OR "hawaiian native*":ab,ti OR indigen*ab,ti OR innu*ab,ti OR inuit*ab,ti OR inupiat*ab,ti OR kalaallit*ab,ti OR maori*ab,ti OR metis:ab,ti OR "native american*":ab,ti OR "native hawaiian*":ab,ti OR "native people*":ab,ti OR "native population*":ab,ti OR navaho*ab,ti OR navajo*ab,ti OR "pacific islander*":ab,ti OR pasifika*ab,ti OR "torres strait islander*":ab,ti OR tribal:ab,ti OR tribe*ab,ti OR zuni:ab,ti | 76,676         |
| #6 | #4 OR #5                                                                                                                                                                                                                                                                                                                                                                                                                                                                                                                                                                                                                                  | 90,088         |
| #7 | #3 AND #6                                                                                                                                                                                                                                                                                                                                                                                                                                                                                                                                                                                                                                 | 87             |
| #8 | #7 AND [english]/lim                                                                                                                                                                                                                                                                                                                                                                                                                                                                                                                                                                                                                      | 85             |

DOI: 10.1503/cjs.004619

Online appendices are unedited and posted as supplied by the authors.

|    | <b>CINAHL Plus with Full Text (via Ebsco) Query 2018-10-12</b>                                                                                                                                                                                                                                                                                                                                                                                                                                                                                                                                                                                                                                                                                                                                                                                                                                                                                         | <b>Results</b> |
|----|--------------------------------------------------------------------------------------------------------------------------------------------------------------------------------------------------------------------------------------------------------------------------------------------------------------------------------------------------------------------------------------------------------------------------------------------------------------------------------------------------------------------------------------------------------------------------------------------------------------------------------------------------------------------------------------------------------------------------------------------------------------------------------------------------------------------------------------------------------------------------------------------------------------------------------------------------------|----------------|
| #1 | (MH "Diabetic Foot") OR ((MH "Diabetes Mellitus") AND (MH "FootUlcer"))                                                                                                                                                                                                                                                                                                                                                                                                                                                                                                                                                                                                                                                                                                                                                                                                                                                                                | 7,411          |
| #2 | TI ("diabetic foot" OR "diabetic feet" OR "diabetic ulcer*" OR (diabet* AND ulcer* AND (foot OR feet*))) OR AB ("diabetic foot" OR "diabetic feet" OR "diabetic ulcer*" OR (diabet* AND ulcer* AND (foot OR feet*)))                                                                                                                                                                                                                                                                                                                                                                                                                                                                                                                                                                                                                                                                                                                                   | 5,124          |
| #3 | #1 OR #2                                                                                                                                                                                                                                                                                                                                                                                                                                                                                                                                                                                                                                                                                                                                                                                                                                                                                                                                               | 8,413          |
| #4 | (MH "Health Services, Indigenous") OR (MH "Indigenous Health") OR (MH "Indigenous Peoples+")                                                                                                                                                                                                                                                                                                                                                                                                                                                                                                                                                                                                                                                                                                                                                                                                                                                           | 14,842         |
| #5 | TI (aborigin* OR "alaska native*" OR alaskan native* OR aleut* OR "american indian*" OR amerind* OR bushmen OR eskimo* OR "first nation" OR "first nations" OR "hawaiian native*" OR indigen* OR innu* OR inuit* OR inupiat* OR kalaallit* OR maori* OR metis OR "native american*" OR "native hawaiian*" OR "native people*" OR "native population*" OR navaho* OR navajo* OR "pacific islander*" OR pasifika* OR "torres strait islander*" OR tribal OR tribe* OR zuni) OR AB (aborigin* OR "alaska native*" OR alaskan native* OR aleut* OR "american indian*" OR amerind* OR bushmen OR eskimo* OR "first nation" OR "first nations" OR "hawaiian native*" OR indigen* OR innu* OR inuit* OR inupiat* OR kalaallit* OR maori* OR metis OR "native american*" OR "native hawaiian*" OR "native people*" OR "native population*" OR navaho* OR navajo* OR "pacific islander*" OR pasifika* OR "torres strait islander*" OR tribal OR tribe* OR zuni) | 20,029         |
| #6 | #4 OR #5                                                                                                                                                                                                                                                                                                                                                                                                                                                                                                                                                                                                                                                                                                                                                                                                                                                                                                                                               | 26,263         |
| #7 | #3 AND #6                                                                                                                                                                                                                                                                                                                                                                                                                                                                                                                                                                                                                                                                                                                                                                                                                                                                                                                                              | 38             |
| #8 | #7 AND Narrow by Language: - english                                                                                                                                                                                                                                                                                                                                                                                                                                                                                                                                                                                                                                                                                                                                                                                                                                                                                                                   | 38             |

### **Cochrane Query 2018-10-12**

| ID | Search Hits                                                                                                                                             |
|----|---------------------------------------------------------------------------------------------------------------------------------------------------------|
| #1 | MeSH descriptor: [Diabetic Foot] explode all trees 784                                                                                                  |
| #2 | MeSH descriptor: [Diabetes Mellitus] explode all trees 25839                                                                                            |
| #3 | MeSH descriptor: [Foot Ulcer] explode all trees 861                                                                                                     |
| #4 | #1 AND (#2 OR #3) 784                                                                                                                                   |
| #5 | ("diabetic foot" OR "diabetic feet" OR "diabetic ulcer*" OR (diabet* AND ulcer* AND (foot OR feet*)):ti,ab,kw (Word variations have been searched) 1993 |
| #6 | #4 OR #5 1993                                                                                                                                           |
| #7 | MeSH descriptor: [Health Services, Indigenous] explode all trees 31                                                                                     |

**Appendix 1** to Isa S, Pace D. Is ethnicity an appropriate measure of health care marginalization? A systematic review and meta-analysis of the outcomes of diabetic foot ulceration in Aboriginal populations. *Can J Surg* 2021. Copyright © 2021 The Author(s) or their employer(s). To receive this resource in an accessible format, please contact us at [cmajgroup.cmajca](mailto:cmajgroup.cmajca).

DOI: 10.1503/cjs.004619

*Online appendices are unedited and posted as supplied by the authors.*

- #8 MeSH descriptor: [American Native Continental Ancestry Group] explode all trees  
278
- #9 MeSH descriptor: [Oceanic Ancestry Group] explode all trees 154
- #10 #7 OR #8 OR #9 438
- #11 (aborigin\* OR "alaska native\*" OR alaskan native\* OR aleut\* OR american indian\* OR amerind\* OR bushmen OR eskimo\* OR "first nation" OR "first nations" OR hawaiian native\* OR indigen\* OR innu\* OR inuit\* OR inupiat\* OR kalaallit\* OR maori\* OR metis OR native american\* OR native hawaiian\* OR native people\* OR native population\* OR navaho\* OR navajo\* OR pacific islander\* OR pasifika\* OR torres strait islander\* OR tribal OR tribe\* OR zuni):ti,ab,kw (Word variations have been searched)2533
- #12 #10 OR #11 2552
- #13 #6 AND #12 5
